1 **Paper Title:** Acceptability of Community Midwives in rural communities of Pakistan: A  
2 qualitative exploratory study

3

4 **Short title:** Acceptability of community midwives in Pakistan

5

6 **Author Names:**

7 Bakhtawar Muhammad Hanif Khowaja<sup>1</sup>, Anam Shahil Feroz<sup>2</sup>, Musarrat Rani<sup>3</sup>, Quratulain  
8 Khowaja<sup>2</sup>, Mehmooda Afroz Ali Khowaja<sup>4</sup>, Farina Abrejo<sup>2</sup>, Sarah Saleem<sup>2</sup>

9

10 <sup>1</sup>The Aga Khan University- Department of Obstetrics and Gynecology, Stadium Road, PO Box  
11 350, Karachi 74800

12 <sup>2</sup>The Aga Khan University – Department of Community Health Sciences, Stadium Road, PO Box  
13 3500, Karachi 74800

14 <sup>3</sup>Ziauddin University, School of Nursing and Midwifery, Karachi

15 <sup>4</sup>Aga Khan University, School of Nursing and Midwifery, Karachi

16

17 **Corresponding Author\***

18 Email: bakhtawarshalwani92@gmail.com (BK)

19

20

21

22

23 **Abstract**

24 **Introduction**

25 The Government of Pakistan initiated the Community Midwifery program in 2006 to provide  
26 skilled birth attendance to women living in rural areas. However, the acceptability of midwives  
27 and what impact these community midwives have made on overall maternal morbidity and  
28 mortality remains an unanswered question. We explored the perceptions of health officials,  
29 midwifery students, midwives and community women about the factors that influence the  
30 acceptability of community midwives' services in the rural district Thatta, Pakistan.

31 **Materials and Methods**

32 A qualitative exploratory study was conducted in the rural district Thatta of Pakistan. In-depth  
33 interviews were conducted with health officials, midwifery students who were currently enrolled  
34 in the midwifery program of the district; community midwives providing services in district  
35 Thatta, and trained community midwives who are not practicing. Interviews were also conducted  
36 with community women. Data were analyzed using the qualitative thematic analysis approach  
37 and the deductive analysis method.

38 **Results**

39 Two overarching themes were identified: (I) community acceptance and support; and (II)  
40 dynamics between CMWs and other health care providers. The major hindering factors to  
41 CMWs acceptance included their young age challenging social acceptability, patronizing  
42 behavior of doctors, high acceptance of traditional birth attendants working in rural areas, and  
43 the community's reluctance towards referral services. The facilitating factors included clients'  
44 privacy maintained at birth stations and the affordability of community midwives' services.

45

46 **Conclusion**

47 There are deep-rooted challenges related to the acceptability of midwifery services at the  
48 community level and with other competing healthcare providers which need advocacy to support  
49 and accept their services at the community level and by other professionals.

50

51

## 52 **Introduction**

53 It is estimated that globally around 830 women die every day due to preventable causes related to  
54 pregnancy and childbirth [1]. Around 73 low- to middle-income countries (LMICs) account for  
55 92% of maternal and newborn mortalities including India and Pakistan [2]. Pakistan is among the  
56 top ten countries contributing 59% of maternal deaths globally [3]. The lifetime risk of death for  
57 a Pakistani woman due to pregnancy-related causes is 1 in 80, compared to 1 in 61 in low to  
58 middle-income countries including Africa and South Asia countries, and 1 in 4,085 in high-  
59 income countries [4].

60 Reduction in maternal mortality is a priority target under goal 3 of the Sustainable Development  
61 Goals (SDGs) i.e. “To ensure healthy lives and promote well-being for all at all ages” through  
62 2030 [5]. Skilled birth attendance is a prerequisite to attaining a reduction in maternal mortality  
63 [6]. World Health Organization (WHO) emphasizes skilled care at birth to reduce maternal and  
64 newborn deaths [6]. According to the WHO, skilled health workers include a trained doctor,  
65 nurse, or midwife during pregnancy, delivery, and postnatal period [7].

66 There is collective evidence about the role of midwives in positive pregnancy outcomes for  
67 women and newborns [8]. Accessible midwifery services reduce health inequalities across the  
68 world by provision of services to underserved areas and it offers positive benefits in terms of  
69 economic, efficient, and effective services [9]. Most countries succeeded in improving maternal  
70 mortality and morbidity by ensuring the availability and accessibility of midwifery services and  
71 primary care thus improving skilled care for pregnant women [10].

72 Sweden midwives are well recognized and have unique history regarding the involvement of  
73 midwives in their health system. The intense reduction in maternal mortality in Sweden during

74 the last century has been attributed to the role of midwifery [10]. This has been achieved through  
75 midwives' contribution to all aspects of women's health care [10]. Swedish midwives hold a  
76 unique level of autonomy in the health system to provide services during pregnancy and  
77 childbirth [10].

78 Based on the evidence of community midwives' contribution to addressing the issue of high  
79 maternal mortality, many countries adopted the model of introducing community midwives into  
80 their health systems [11]. The Government of Pakistan also initiated the Community Midwifery  
81 program in 2006 to provide skilled birth attendance to women living in rural areas [12]. The  
82 CMW program was introduced to establish home-based clinics to provide antenatal, postnatal,  
83 and neonatal services to rural communities [12].

84 Despite a large investment in the CMW program by the government of Pakistan, the challenge of  
85 the non-availability and non-accessibility of community midwives in their local communities is  
86 apparent. Research evidence from rural districts of Pakistan suggests that the utilization of  
87 maternal and newborn services through community midwives is very low and that a large  
88 proportion of trained CMWs are not in practice. [13].

89 Reports from 2012 to 2013 show that only 20.8 % of pregnant women in district Thatta received  
90 maternal healthcare services [19]. Thus, the midwifery school was established in the year 2013 in  
91 the district to train community midwives for the provision of maternal and neonatal services  
92 [20]. The midwifery school offers 24 months diploma program and trains approximately more  
93 than 30 CMWs each year [20]. However, the district data displays that out of 150 deployed and  
94 registered CMWs, only 17 CMWs report to the maternal and neonatal, child health (MNCH)

95 program monthly. Identifying the causes of CMWs' non-retention and non-availability in their  
96 communities is important to inform suitable policy recommendations.

97 To do so, we focused on the views of health officials, community midwives, and community  
98 women of district Thatta to explore factors influencing community midwives' utilization of  
99 services through the use of the Community Midwifery (CMW) model [16]. The CMW model  
100 (Figure. 1) has been established with the Government of Pakistan's MNCH program strategy to  
101 expand community-level CMWs services in Pakistan [15].

102 It comprises six major factors: (I) CMWs skills competencies, (II) supportive supervision, (III)  
103 affordability for CMWs services, (IV) community acceptance and support, (V) linkages between  
104 CMWs and facilities, and (VI) dynamics between CMWs and health care providers.

105

106 Fig.1. Community Midwifery Model

107

108 The findings on facilitators and barriers to the factors of supportive supervision and CMWs'  
109 skills and competencies have been reported in a separate paper [17]. In this paper, we present  
110 results on the factors related to CMWs acceptability to practice in their communities.

111

112

113

114

## 115 **Materials and Methods**

### 116 *Study setting*

117 The study site selected was district Thatta of Province Sindh, which is a rural district with a total  
118 population of 979,817 [18]. The number of community health centers available in the district is  
119 adequate [25] and there is a midwifery school to train midwives [26]. The number of trained  
120 community midwives is sufficient in the district as evident by the health profile of the district  
121 [27], however, the services provided by community midwives is unknown.

122

### 123 *Study design and participants*

124 We used an exploratory qualitative study design by conducting in-depth interviews (IDIs) using  
125 a semi-structured interview guide and a purposive sampling approach. The study is stated as per  
126 the guidance provided in the consolidated criteria for reporting qualitative research  
127 (supplemental file 1).

128 IDIs were conducted with officials from the health department who were involved in CMWs  
129 training and deployment including the district health officer, the district coordinator of the  
130 MNCH program, the principal of the midwifery school of district Thatta, the general secretary of  
131 the midwifery association of Pakistan, and the director of general nursing and midwifery  
132 program. The aim of interviews with health officials and program implementers was to  
133 understand their roles related to administrative and organizational perspectives.

134 Interviews were also conducted with three categories of the CMWs including midwifery students  
135 who were currently enrolled in the community midwifery program in Thatta; trained community  
136 midwives providing services in district Thatta; trained community midwives who have left the

137 midwifery profession; and with community married women from district Thatta. The purpose of  
138 interviews with health officials, students, midwives, and community women was to explore key  
139 factors encountered at each level of midwifery training and practice.

#### 140 *Data collection and reflexivity*

141 Semi-structured interview guides were developed by the research team and reflected the four  
142 domains of the CMW model on the acceptability of CMWs. The detailed interview guides are  
143 provided as Supplemental file 2. These were prepared in the English language and translated into  
144 local languages Urdu and Sindhi to capture the perceptions of the study participants. The  
145 interviews were conducted in Urdu and Sindhi languages between August 2020 and December  
146 2020 by the investigating team. All the study team members have expertise in qualitative  
147 research and an understanding of the scope of practices of midwives for maternal and child  
148 health.

149 We included key themes with several specific questions: (1) Affordability for CMWs services,  
150 such as CMWs fee for services, financial class of the community that approaches CMWs,  
151 community women affordability to utilize services (2) Community's acceptance and support,  
152 such as the community's trust for CMWs services, women preference for maternal and neonatal  
153 services (3) Linkages between CMWs and facilities, such as linkages with referral health  
154 facilities (4) Dynamics between CMWs and other health care providers, such as their  
155 relationships with doctors, lady health workers, traditional birth attendants, sonologists,  
156 dispensers, and other healthcare workers working in the region.

157 Due to the restrictions in the district because of the Covid-19 situation, all the interviews were  
158 conducted via telephonic calls. These interviews were scheduled according to participants'



159 preference of time and were audio-recorded following verbal informed consent from study  
160 participants. The purpose of the study was well-informed to all participants through an official  
161 letter sent by the university in advance of their interviews. Each interview lasted between 45 to  
162 60 minutes. The lead author was fluent in local languages and carried out all the interviews. The  
163 data collection was carried out until data saturation was achieved and no new information  
164 emerged. We defined saturation as the amount of data needed until no new information and  
165 meaningful conclusions were drawn out on the research questions [22].

### 166 *Data analysis*

167 The data were transcribed into Sindhi and Urdu languages and later translated into English  
168 language and analyzed manually. The qualitative thematic analysis approach and the deductive  
169 analysis method were adopted as an ongoing iterative process through which facilitating and  
170 hindering factors regarding CMWs' acceptability were identified. This allowed for rigorous  
171 probing during interviews to collect the maximum data about the topic.

172 Manual analysis was done with familiarization of the data which involved reading and re-reading  
173 the transcripts to get familiar with the content. Codes were generated to identify important  
174 features of the data that were relevant to answering the research questions. The entire dataset was  
175 coded, and all the codes and relevant data extracts were collated. The codes and the collated data  
176 were examined for each potential theme. The themes were reviewed in relation to the coded  
177 extracts and the entire data set to generate a thematic map.

178 The researchers from the investigating team (SS, AF, FA, BK,) participated in refining the  
179 codebook to reach a final consensus and resolve any discrepancies to improve the credibility and

180 reliability of the data [23]. To adapt the relevant themes of the CMW model, we removed those  
181 codes that were not reflected in the transcript.

## 182 **Results**

183 A total of 25 semi-structured interviews were conducted with health officials who were involved  
184 in community midwives' training and deployment (n=5), midwifery students (n=5), community  
185 midwives working in the district (n=5), community midwives trained but not working in their  
186 professions (n=5), and community women (n=5). Tables 1 to 4 describe the demographic details  
187 of the study participants.

188 **Table 1- Characteristics of Health Officials**

| <b>Health officials</b>             | <b>N=5</b> |
|-------------------------------------|------------|
| <b>Association with CMW program</b> |            |
| Less than 5 years                   | 2          |
| 5 to 10 years                       | 2          |
| More than 10 years                  | 1          |
| <b>Supervision</b>                  |            |
| District level                      | 3          |
| Provincial level                    | 1          |
| National level                      | 1          |
| <b>Role</b>                         |            |
| Training of CMWs                    | 2          |
| Supervision of CMWs                 | 2          |
| Implementation of Program           | 1          |

189

190

191 **Table 2- Demographic details of midwifery students**

| <b>Midwifery students</b> | <b>N=5</b> |
|---------------------------|------------|
| <b>Age</b>                |            |
| 16-25                     | 4          |
| 26-35                     | 1          |
| <b>Previous Education</b> |            |
| Intermediate              | 5          |
| <b>Marital status</b>     |            |
| Unmarried                 | 4          |
| Married                   | 1          |

192

193 **Table 3- Demographic details of working and non-working groups of midwives**

| <b>Midwives</b>                      | <b>N=10</b> |
|--------------------------------------|-------------|
| <b>Age</b>                           |             |
| 21-25                                | 2           |
| 26-30                                | 1           |
| 31-35                                | 4           |
| 36-40                                | 3           |
| <b>Education</b>                     |             |
| High school                          | 5           |
| Undergraduate                        | 2           |
| Graduate                             | 3           |
| <b>Midwifery course</b>              |             |
| 12 months diploma                    | 3           |
| 18 months diploma                    | 7           |
| <b>Workplace:</b>                    |             |
| Non-Governmental Organizations       | 4           |
| Private organizations                | 5           |
| Health facilities                    | 1           |
| <b>Working experience as midwife</b> |             |
| Less than 5 years                    | 2           |
| Less than 10 years                   | 5           |
| More than 10 years                   | 2           |
| <b>Marital status</b>                |             |
| Unmarried                            | 2           |
| Married                              | 8           |

194

195 **Table 4- Demographic details of community women**

| <b>Community-women</b>                            | <b>N=5</b> |
|---------------------------------------------------|------------|
| <b>Age</b>                                        |            |
| 16-30                                             | 1          |
| 31-45                                             | 3          |
| >45                                               | 1          |
| <b>Education</b>                                  |            |
| None                                              | 2          |
| Primary                                           | 1          |
| College                                           | 2          |
| <b>Antenatal visits for recent pregnancy</b>      |            |
| Less than 3                                       | 3          |
| 3 to 8                                            | 2          |
| <b>Facility approach during recent childbirth</b> |            |
| None (home birth)                                 | 1          |
| CMWs birthing units                               | 1          |
| BHU, RHC (other primary facilities)               | 1          |
| Secondary and tertiary care hospitals             | 2          |

196

197 All the study participants were contacted by the research team using a purposive sampling  
 198 approach and they provided agreement to participate before conducting interviews with them.  
 199 Based on the data collection and thematic analyses involving the four domains of the CMW model,  
 200 two overarching themes were identified: (I) community acceptance and support, and (II) dynamics  
 201 between CMWs and health care providers. The themes and subthemes, and illustrative quotes are  
 202 presented in Table 5.

203 **Table 5: Themes and subthemes**

| Themes                                                       | Subthemes                                                        | Illustrative Quotes                                                                       |
|--------------------------------------------------------------|------------------------------------------------------------------|-------------------------------------------------------------------------------------------|
| <b>Community acceptance and support for CMWs services</b>    | Acceptance of CMWs by community                                  | <i>“Midwives are young girls”<br/>“CMWs charge reasonable fees that everyone can pay”</i> |
|                                                              | Sociocultural factors influencing acceptability of CMWs services | <i>“The major challenge is when we give counseling on sensitive issues”</i>               |
| <b>Dynamics between CMWs and other health care providers</b> | Acceptance of CMWs by doctors is a challenge                     | <i>“They think us as dais (unskilled birth attendant)”</i>                                |
|                                                              | Support from other HCPs                                          | <i>“We try to maintain linkages with TBAs”</i>                                            |
|                                                              | Selection and deployment become a challenge for CMWs services    | <i>“TBAs are very common here as they are easily available”</i>                           |

204

205

206 **Community acceptance and support for CMWs services**

207 *Acceptance of CMWs by community*

208 A majority of midwifery students who were interviewed were unmarried and were under the age  
 209 of 25 years. The eligibility criterion to enroll in the midwifery program requires the completion  
 210 of 12 years of schooling. Most of the girls get enrolled in the program at the ages of 18 to 20  
 211 years and are certified to provide services after the successful completion of two years. The  
 212 novice CMWs being young and unmarried were considered naive by community women to deal

213 with reproductive health matters, which is considered as something related to being married or to  
214 an older age group.

215 *“We try to enroll young and competent girls who show up their commitment to work in*  
216 *communities (KII- principal, midwifery school)*

217 *“Midwives are young girls. They are not competent for services. They go and study, but*  
218 *they don’t have practical skills to perform deliveries” (IDI-Community woman)*

219 *“The young age of community midwives is not acceptable by communities. They think*  
220 *that unmarried girls and young girls do not have any experience to deal with these*  
221 *matters. Of course, experience is always given importance in comparison to the*  
222 *education in any of the fields” (KII- District Health Officer)*

223 On the other hand, a community woman acknowledged CMWs’ diverse role in the provision of  
224 maternal and newborn services that make them significant as they support women throughout  
225 their pregnancy and childbirth process.

226 *“CMWs educate patients, listen to patient concerns, talk to their families, help them with*  
227 *other services such as ultrasound and manage them according to the problem” (IDI-*  
228 *community woman)*

229 Besides, the community’s affordability for CMWs services was identified as a major facilitator  
230 for their services. As CMWs are part of their own communities where they work, they charge  
231 fees for services according to individual’s affordability. Most of the community women  
232 mentioned that CMWs charge less fees compared to doctors.

233 *“CMWs charge reasonable fees that everyone can pay. It is 5 to 10 times less than the*  
234 *doctor’s fees” (IDI-Community woman)*

235           *“People do not want to go to doctors because doctors do not provide them adequate time*  
236           *to listen to their concerns and they charge a lot for their services” (KII- Director,*  
237           *general nursing, and midwifery)*

238   However, a few CMWs reflected that they face challenges in convincing women to refer them to  
239   a better-equipped health facility in cases of high-risk pregnancies or when suffered from  
240   pregnancy complications. One CMW mentioned:

241           *“It is very difficult to explain to them about the referral. They say that if we had to go*  
242           *there why we have visited you and what are you here for” (IDI-Working midwife)*

243   Another reason for refusing referral according to midwives’ viewpoints is the lack of privacy in  
244   labor rooms of hospitals as cited by a CMW:

245           *“In our area, there is one big hospital that is civil hospital Thatta where multiple patients*  
246           *deliver in a single labor room. Most women do not prefer to go to hospitals because of*  
247           *that. We conduct delivery in a single private room that’s why people prefer to come to*  
248           *midwives than going to the hospital” (IDI-working midwife)*

249   Contradictory to this, community women showed up their interest in having childbirth at home  
250   instead of covering the distance to reach any health facility such as a midwife’s birthing station.  
251   They voiced their concerns regarding the non-availability of transportation and increased costs to  
252   move towards other facilities. They preferred traditional birth attendants as they were easily  
253   available and provided home services at low costs.

254           *“Dais (TBAs) in our areas are easily approachable and we don’t have to pay anything to*  
255           *reach any other facility. They charge very less in comparison to anyone else” (IDI-*  
256           *community women)*

257           *“To increase skilled birth attendance, we started training TBAs to link them with CMWs*  
258           *but this strategy didn’t work because people are reluctant to go out for deliveries. TBAs*  
259           *provide home services and even if CMWs would provide them home services, they would*  
260           *prefer a TBA over CMW because of low cost and experience in childbirth process” (KII-*  
261           *Coordinator, MNCH program)*

262   When exploring community women’s preferences, many women (3/5) were unaware of services  
263   provided by community midwives, and they informed that there were no CMWs birthing stations  
264   established in their areas.

265           *“I have no idea about if we have any birthing station in our area, we have some small*  
266           *setups of clinics and LHVs run those clinics but haven’t heard about any community*  
267           *midwife who is working nearby” (IDI- community woman)*

### 268   ***Sociocultural factors influencing acceptability of CMWs services***

269   Many social and cultural issues impede the acceptability of CMWs in rural areas. Most of the  
270   CMWs recognized sociocultural issues as a hindering factor for CMWs practices. The non-  
271   acceptance of CMWs families to establishing birthing stations at homes, the family’s restrictions  
272   to allow CMWs to work in hospitals because of female mobility issues, and the reservations of  
273   CMWs to allowing males (husbands of pregnant women) at their birthing stations were some of  
274   the identified impeding factors for CMWs services.

275           *“The people in our village and our family don’t allow us to work in a male dominated*  
276           *area because of security issues and our cultural norms” (IDI-Non-working CMW)*

277   Moreover, CMWs’ counseling and educational services over sensitive issues like family  
278   planning, pregnancy termination, or abortion were disregarded by the community people.

279 *“Working as a midwife is a challenge itself, acceptance among the community is the*  
280 *major challenge and this is when we give counseling on family planning or abortion. It’s*  
281 *because we’ve taboos associated with these topics” (IDI-Working midwife)*

282 *“As midwives provide services to their local communities, they have to face many*  
283 *cultural challenges” (KII- general secretary- MAP)*

## 284 **Dynamics between CMWs and other health care providers**

### 285 *Acceptance of CMWs by doctors is a challenge*

286 Most of the respondents acknowledged that CMWs strive to maintain a positive relationship with  
287 every health care provider working in the community and especially with the doctors who  
288 provide pregnancy and delivery care. However, their efforts are not acknowledged by the  
289 doctors, and they consider CMWs as ‘*unskilled birth attendants (Dais)*’, and not trained  
290 healthcare providers. Doctors also misinform community people about their services as  
291 acknowledged:

292 *“Women Medical Officers misguide people against CMWs if they refer any complicated*  
293 *case to doctors. The referred woman when is delivered by the doctor, the whole credit is*  
294 *taken by the doctor, and they provoke patients about the complications. When the same*  
295 *patient goes back to her home, she gives that message to everyone in the community that*  
296 *CMWs are uneducated and non-qualified to conduct deliveries” (KII- Coordinator*  
297 *MNCH program)*

298 *“At their level, we are nothing. They think of us as dais (unskilled birth attendants).*  
299 *Some of them support us and they think that there is someone who has the knowledge, but*



300 *some say to their clients to visit them and not us as they think we are dais and they think*  
301 *that we have not learned much” (IDI-Working midwife)*

### 302 ***Support from other HCPs***

303 CMWs stated that they try to build linkages with health facilities and other health care providers  
304 working in the district to establish their work, for example with sonologists and laboratories to  
305 refer their clients for essential services. Some of the CMWs also reported that they maintain  
306 good relations with TBAs, and they provide a monetary share to TBAs from service charges for  
307 delivery and childbirth, if any client is referred to them by TBAs.

308 *“We have good linkages with Sonographers and laboratories to referring patients for*  
309 *services” (IDI-Working midwife)*

310 *“We try to maintain linkages with TBAs. We provide them some share if they refer any*  
311 *patient to them for delivery” (IDI- Working midwife)*

312 Lady Health Workers (LHWs) play an essential role in providing health services to communities,  
313 especially in rural areas to those people who have difficulty in access to health services. Every  
314 CMW in district Thatta is consigned to five Lady Health Workers (LHWs) of the specific area.  
315 LHWs indicate and register individuals and households in the area and refer clients to nearby  
316 CMWs for ANC, PNC, delivery care, and other maternal services to increase skilled birth  
317 attendance in rural areas. However, the coordination between LHWs and CMWs continued to be  
318 discordant. This is because LHWs are ineligible and non-licensed to provide maternal and  
319 newborn services and the professional rivalry creates challenges for CMWs to coordinate with  
320 LHWs.

321 *“Under one CMW, there are 5 LHWs to support each other. The registration of pregnant*  
322 *women is carried out by the LHWs. They register each person in the village, the children,*

323 *the adults, and everyone. The bad luck is that we couldn't strengthen the coordination*  
324 *between CMWs and LHWs” (KII- district health coordinator)*

325 ***Selection and deployment become a challenge for CMWs services***

326 Thatta is divided into urban and rural geographical zones. The urban zone of Thatta has an  
327 increased number of doctors, midwives, and health care providers [18]. The increasing  
328 availability and accessibility to doctors and already working CMWs in urban regions challenges  
329 newly deployed CMWs in establishing their birthing stations.

330 *“I live in a town where every second person has done midwifery and MBBS. They are*  
331 *available in every street. We cannot establish a good setup here because there are a lot*  
332 *of people in this profession” (IDI- Non-working CMW)*

333 *“We have an admission committee to enroll girls to CMWs from those areas where there*  
334 *is the unavailability of birthing stations, but we still need to strengthen this as we see that*  
335 *there are many gaps (KII- principal, midwifery school)*

336 CMWs' deployment in areas with increased dispersion of TBAs' is a barrier to their services.  
337 Most of the community women preferred TBAs for delivery care over CMWS as they believe  
338 that young, unmarried, and inexperienced CMWs cannot provide efficient maternal services  
339 compared to an experienced TBA who provides low-cost services.

340 *“TBAs are very common here as they are easily available, and they are very experienced*  
341 *to conduct deliveries in our village” (IDI- Community woman)*

342 *“The strategies to increase skill birth attendance through CMWs is still lacking as people*  
343 *still prefer TBAs over CMWs” (KII- coordinator, MNCH program)*

344

345

## 346 **Discussion**

347 CMW program is an important part of the MNCH program, and it can improve skilled care birth  
348 attendance in rural areas of Pakistan if accepted by communities and other health care providers.  
349 This study identified facilitators and barriers to community midwives' acceptance in the context  
350 of district Thatta.

351 The young age of a midwife to establish her own birthing station is not acceptable by the  
352 communities. The maternal and neonatal services provided by young and unmarried girls is a  
353 hindering factor to gain the trust of the community, as they perceive them to be inexperienced  
354 and uninformed about reproductive health matters. The enrollment of girls in the CMW program  
355 and becoming eligible to provide maternal and neonatal services as CMW at a very young age is  
356 not accepted by communities. Most of the CMWs in the district are unmarried and community  
357 women consider them novice to assist them with childbirth processes. Similar findings on the  
358 lack of community trust for CMWs services have also been identified in a qualitative study  
359 carried out on CMWs working in different parts of the province of Sindh [24]. Besides, these  
360 findings have been also reported from regions outside Pakistan such as Nigeria and Niger  
361 reported similar results on the non-acceptance of midwifery personnel due to their typically  
362 young age [25-26].

363 However, the CMWs cost for services is acknowledged by community people as they charge two  
364 to three times less fees than medical doctors and obstetricians. Moreover, CMWs are better  
365 informed about the background and financial state of their local communities, and they consider  
366 the cost of services accordingly. This is one of the significant aspects that attracts community  
367 women to utilize CMWs services. The relatively reduced cost of services of CMWs in  
368 comparison to doctors has been reported as a key facilitator in other LMICs including Africa

369 [27]. Some experts have also noted that high-income countries with the lowest intervention rates,  
370 best outcomes, and lowest costs have integrated midwifery-led care into their health care systems  
371 [28]. Evidence from high-income countries found such models to be a cost-efficient way to  
372 improve health outcomes, reduce medical interventions and increase satisfaction with care [29].

373 Community midwives provide diverse roles such as patient assessment, health education,  
374 advocacy, and referral of high-risk pregnancies. The varied role of CMWs fascinates community  
375 women to utilize their services however, the awareness of CMWs' services to their communities  
376 is a problem. The high accessibility and readiness of traditional birth attendants to perform  
377 deliveries in the rural communities hinder access of women to CMWs and they prefer to deliver  
378 babies at *'home'* rather than reaching out to any facility or birthing stations. The approach to  
379 TBAs during pregnancy and childbirth is found in most rural areas in all provinces of Pakistan  
380 [30]. While rates of home delivery have decreased in LMICs, about 25% of deliveries worldwide  
381 still occur outside a health facility [31]. TBAs still continue to play significant roles in maternal  
382 health care in rural and deprived communities where there is a shortage of skilled birth  
383 attendants. The findings from Ghana informed that women traditionally prefer to deliver at home  
384 because it is cheaper and easier as women who deliver at home receive social support from their  
385 extended families and do not have to pay much for the delivery services [32].

386 The social and cultural system is another factor that hinders the acceptability of CMWs in rural  
387 areas. CMWs find challenges to educate community people about important yet sensitive  
388 maternal health matters such as family planning and abortions, which are not given importance,  
389 especially in rural areas, and addressing these become a challenge for community midwives.  
390 Moreover, male family members don't allow females to work due to the patriarchal system  
391 followed in rural areas of Pakistan. CMWs are not allowed to establish birthing stations at their

392 homes and are not allowed to work in community clinics or maternity settings due to female  
393 mobility issues which are the cause of underutilization of midwifery services in rural areas of  
394 Pakistan. The female mobility issues in Pakistan have underestimated female empowerment and  
395 this hinders female development in every aspect such as social, economic, and career  
396 development [33].

397 Besides, the community's and the healthcare providers' support for CMWs' services is  
398 insignificant in terms of the acceptability of services. CMWs struggle to gain their status in  
399 communities where TBAs and doctors are recognized to deliver maternal and newborn services.  
400 The communication and coordination between CMWs and doctors are negligible. Doctors  
401 consider them unskilled professionals and they convey this perception to communities which  
402 becomes a cause of their non-acceptability by the community. The conflict between CMWs and  
403 doctors for utilization of maternal and newborn services has been identified in different parts of  
404 the world such as in a study conducted in Australian public hospitals [34]. Despite much progress  
405 in the legitimization of the midwifery profession in many high-income countries, these countries  
406 also face disagreements among maternity care professionals regarding midwifery autonomy and  
407 scope of their practice [35]. Maternity care and services require close cooperation between  
408 obstetricians, midwives, physicians, and nurses [36].

409 The functioning of CMWs in the district depends on coordination with LHWs for the referral of  
410 pregnant women to CMWs. However, the lack of coordination between LHWs and CMWs  
411 impedes their services. This lack of coordination between two cadres is presumed due to the  
412 professional rivalry between the two cadres. Yet, professional jealousy is a typical phenomenon  
413 in healthcare and has been experienced in every health setting from a smaller setting to a larger  
414 setup [37].

415 It has been identified that the district Thatta is divided into rural and urban zones and most of the  
416 girls were enrolled from the urban regions where there was already a high saturation of  
417 healthcare providers such as medical doctors, CMWs, and LHVs. The rural regions of the district  
418 still suffer from issues of non-availability of birthing stations and even if CMWs were available  
419 in those regions, they were not functional due to the increased approach of the community  
420 towards TBAs for deliveries. This is due to a lack of planning of program implementers to  
421 execute this significant program in rural communities for the purpose the program was evolved.  
422 A similar finding has been reported in a study carried out on capturing the views of MNCH  
423 program specialists who provided their insights on the malfunctioning of various vertical  
424 programs after the devolution of the federal government to provincial governments [38]. Ideally,  
425 devolution provides increased opportunities for provinces to introduce and prioritize health  
426 policies. Countries like Indonesia and Kenya provide useful examples of improved health  
427 systems following devolution [39-40]. The health services delivery and health governance in  
428 these countries have improved after the devolution [39-40]. Devolution has transformed the  
429 power and decision-making authorities at the subnational level and has provided increased  
430 opportunities to prioritize preventive health services rather than curative health services [41].  
431 However, the reform in Pakistan faced a number of challenges due to a lack of defined national  
432 policies and unorganized provincial health strategies [38].

433 Our study has several strengths. First, the exploratory design of this study helped us to understand  
434 the factors that influence CMWs' acceptability from all levels of the CMW program from  
435 organization to implementation. Second, the rigor of the study was achieved by enhancing the  
436 credibility of the findings from different data sources including health officials, midwives,  
437 students, and community women.

438 The study also has some limitations. First, the data collection was done through telephonic  
439 interviews because of the pandemic situation and the facial expressions and physical observations  
440 were therefore missed during the data collection. This also limited us to capture data from the  
441 participants who had no access to mobile phones. Secondly, the study focused only on the  
442 perspective of the participants who are a direct or indirect part of the MNCH or CMW program.  
443 The interviews with doctors, LHWs, and TBAs of the rural areas would have provided more  
444 insights and understanding of the current processes to strengthen the findings.

445 In order to address the effective utilization of CMWs services, the study recommends  
446 strengthening the program implementation at all levels. Firstly, the study provides insights to  
447 program implementers to rearrange the selection and deployment of CMWs. They should be  
448 selected from the areas where there is a need for CMWs and not from the areas with a saturation  
449 of doctors, working midwives, and TBAs. Secondly, the placement of CMWs must be linked with  
450 other MNCH activities to facilitate referral, promote health education, and create awareness of this  
451 significant cadre among health care providers and in the communities. Thirdly, the recognition of  
452 CMWs as professionals and skilled workers should be emphasized through different platforms to  
453 highlight their important role in maternal and neonatal services provision. Lastly, efforts to  
454 increase female empowerment are required to sustain services provided by skilled care workers  
455 such as CMWs.

## 456 **Conclusion**

457 In conclusion, community midwives can play a vital role in reducing maternal and newborn  
458 mortality rates and in achieving progress in health service delivery. However, the findings suggest  
459 that these improvements cannot be made until this cadre will be accepted by community people

460 and other health care providers. The study provided an extensive understanding of the factors  
461 influencing CMWs acceptability in district Thatta.

462 The insights to program implementers to rearrange age criteria for selection and deployment of  
463 CMW and the program implementers need to work on strategies and interventions to develop the  
464 community's and health care providers' trust for community midwives' services. This can help to  
465 achieve the aim of introducing the CMW program in Pakistan. However, disregarding community  
466 acceptance and absorption of CMWs in the health system, the aim of the development of this cadre  
467 cannot be achieved. The CMW program has been engrossed in the health system of Pakistan but  
468 has not yet fully accepted to carry out its roles.

469

470

471

472

473

474

475

476

477

478

479



480 **Acknowledgment**

481 We would like to acknowledge Ms. Arusa Lakhani (School of Nursing, Aga Khan University),  
482 Mehmooda Afroz Ali Khowaja (School of Midwifery, Lady Dufferin), Dr. Raheela (School of  
483 Midwifery, Thatta) for their assistance in data collection and providing contacts with key  
484 stakeholders.

485 ***Ethics***

486 Ethical approval to conduct the study was given by the Aga Khan University Ethical Review  
487 Committee (2020-3391-11138). Participants provided verbal consent to indicate their willingness  
488 to participate. Voluntary participation and the right to ask any questions and to decline  
489 participation at any time were emphasized during the data collection.

490 ***Availability of data and materials***

491 The datasets were collected and analyzed and can be made available from the corresponding author  
492 on reasonable request

493 ***Competing interest***

494 None declared

495 ***Funding***

496 The paper is from the first author's thesis work. The authors have not declared a specific grant  
497 for this research from any funding agency in the public, commercial or not-for-profit sectors.

498

499

500 *Author Contributions*

501 BK is a student of the MSc Health Policy and Management Programme in the Aga Khan  
502 University, Community Health Sciences Department, Karachi, Pakistan. The manuscript has  
503 been prepared from her thesis work. The thesis has been supervised by SS. The thesis committee  
504 members AF & FA supported the conduct of this research. This qualitative study was  
505 conceptualized by BK and SS. BK conducted the study and prepared the first draft of the  
506 manuscript. SS, AF, FA & MR provided facilitation during the data collection. SS and AF  
507 provided guidance for developing the conceptual framework of the study. SS, AF, FA, QK, and  
508 MR reviewed the manuscript several times and provided feedback. All authors have reviewed  
509 and approved the final version of the manuscript

510

511

512

513

514

515

516

517

518

519

520  
521  
522  
523  
524  
525  
526  
527  
528  
529  
530  
531  
532  
533  
534  
535  
536  
537  
538  
539  
540  
541

## References

1. World Health Organization. Making every baby count: audit and review of stillbirths and neonatal deaths. [www.who.int/maternal-newborn-adolescent/documents/stillbirth-neonatal-death-review/en/](http://www.who.int/maternal-newborn-adolescent/documents/stillbirth-neonatal-death-review/en/). Geneva: World Health Organization (WHO), 2016.
2. Bauserman M, Thorsten VR, Nolen TL, Patterson J, Lokangaka A, Tshefu A, Patel AB, Hibberd PL, Garces AL, Figueroa L, Krebs NF. Maternal mortality in six low and lower-middle income countries from 2010 to 2018: risk factors and trends. *Reproductive health*. 2020 Dec;17(3):1-0.
3. Geller SE, Koch AR, Garland CE, MacDonald EJ, Storey F, Lawton B. A global view of severe maternal morbidity: moving beyond maternal mortality. *Reproductive health*. 2018 Jun;15(1):31-43.
4. World Health Organization. Maternal mortality: evidence brief. World Health Organization; 2019.
5. Moyer JD, Hedden S. Are we on the right path to achieve the sustainable development goals?. *World Development*. 2020 Mar 1;127:104749.
6. Yaya S, Ghose B. Global inequality in maternal health care service utilization: implications for sustainable development goals. *Health Equity*. 2019 Apr 26;3(1):145-54.
7. World Health Organization. Definition of skilled health personnel providing care during childbirth: the 2018 joint statement by WHO, UNFPA, UNICEF, ICM, ICN, FIGO and IPA. World Health Organization; 2018.
8. Edmonds JK, Ivanof J, Kafulafula U. Midwife led units: transforming maternity care globally. *Annals of global health*. 2020;86(1).

- 542 9. Murraray-Davis B, Hutton EK, Carty E, Kaufman K, Butler M, Martin G, Lam A, Bi M,  
543 Belanger J, Campbell A, Robertson A. Comprehensive Midwifery-The role of the  
544 midwife in health care practice, education, and research: An Interactive Guide to the  
545 Theory and Evidence of Practice.
- 546 10. Berg M, Ólafsdóttir ÓA, Lundgren I. A midwifery model of woman-centred  
547 newbornbirth care–In Swedish and Icelandic settings. *Sexual & Reproductive Healthcare*.  
548 2012 Jun 1;3(2):79-87.
- 549 11. Kachikis A, Moller AB, Allen T, Say L, Chou D. Equity and intrapartum care by skilled  
550 birth attendant globally: protocol for a systematic review. *BMJ open*. 2018 May  
551 1;8(5):e019922.
- 552 12. National Maternal NaCHP. Program PC-1. Islamabad: Maternal, Neonatal and Child  
553 Health Program, Ministry of Health, Government of Pakistan; 2007
- 554 13. Majrooh MA, Hasnain S, Akram J, Siddiqui A, Memon ZA. Coverage and quality of  
555 antenatal care provided at primary health care facilities in the ‘Punjab’ province of  
556 ‘Pakistan’. *Plos one*. 2014 Nov 19;9(11):e113390.
- 557 14. Shahid S. Midwives in low-resource settings. *British Journal of Midwifery*. 2020 Nov  
558 2;28(11):796-8.
- 559 15. Jan R, Lakhani A, Rattani S, Lalji L, Mubeen K, Jaffer MQ. Can CMWs sustain quality  
560 services and high coverage as private providers in Chitral? A three-year prospective  
561 qualitative study. *Journal of Asian Midwives (JAM)*. 2019;6(2):23-39.
- 562 16. Khowaja BM, Feroz AS, Saleem S. Factors influencing utilisation of services provided  
563 by community midwives and their non-retention in district Thatta, Pakistan: a qualitative  
564 study protocol. *BMJ open*. 2022 Jul 1;12(7):e052323.

- 565 17. Khowaja BM, Feroz AS, Saleem S. Facilitators and barriers influencing utilization of  
566 services provided by community midwives in district Thatta, Pakistan: a qualitative  
567 exploratory study. *BMC pregnancy and childbirth*. 2022 Dec;22(1):1-2.
- 568 18. <http://rdpi.org.pk/wp-content/uploads/2016/06/District-Profile-Thatta.pdf>. (2010).
- 569 19. National Institute of Population Studies (Pakistan), Macro International. Institute for  
570 Resource Development. Demographic, Health Surveys. Pakistan demographic and health  
571 survey. National Institute of Population Studies; 2012.
- 572 20. Sahito NG, Channa AA. Bureau of statistics planning and development department of  
573 Sindh. Health Profile of Sindh; 2016 Jun 13.
- 574 21. Recognized Institutes Of PNC [online], 2022.  
575 Available: [https://www.pnc.org.pk/PNC\\_Recognized\\_Institutes.htm](https://www.pnc.org.pk/PNC_Recognized_Institutes.htm)
- 576 22. Hennink MM, Kaiser BN. Saturation in qualitative research. Thousand Oaks, CA: Sage  
577 Publications Limited; 2020.
- 578 23. Belur J, Tompson L, Thornton A, Simon M. Interrater reliability in systematic review  
579 methodology: exploring variation in coder decision-making. *Sociological methods &*  
580 *research*. 2021 May;50(2):837-65.
- 581 24. Noh JW, Kim YM, Lee LJ, Akram N, Shahid F, Kwon YD, Stekelenburg J. Factors  
582 associated with the use of antenatal care in Sindh province, Pakistan: A population-based  
583 study. *PloS one*. 2019 Apr 3;14(4):e0213987.
- 584 25. Wahlström R, Vahidi R, Nikniaz A, Marions L, Johansson A. Barriers to high-quality  
585 primary reproductive health services in an urban area of Iran: views of public health  
586 providers. *Midwifery*. 2009 Dec 1;25(6):721-30.

- 587 26. Abimbola S, Okoli U, Olubajo O, Abdullahi MJ, Pate MA. The midwives service scheme  
588 in Nigeria. *PLoS medicine*. 2012 May 1;9(5):e1001211.
- 589 27. Crisp N, Brownie S, Refsum C. *Nursing & Midwifery: The key to the rapid and cost*  
590 *effective expansion of high quality universal healthcare.*
- 591 28. Tikkanen R, Gunja MZ, FitzGerald M, Zephyrin L. Maternal mortality and maternity  
592 care in the United States compared to 10 other developed countries. *The Commonwealth*  
593 *Fund*. 2020 Nov 18;10.
- 594 29. Choudhary S, Jelly P, Mahala P. Models of maternity care: a continuity of midwifery  
595 care. *International Journal of Reproduction, Contraception, Obstetrics and Gynecology*.  
596 2020 Jun 1;9(6):2667.
- 597 30. Omer S, Zakar R, Zakar MZ, Fischer F. The influence of social and cultural practices on  
598 maternal mortality: a qualitative study from South Punjab, Pakistan. *Reproductive health*.  
599 2021 Dec;18(1):1-2.
- 600 31. Garces A, McClure EM, Espinoza L, Saleem S, Figueroa L, Bucher S, Goldenberg RL.  
601 Traditional birth attendants and birth outcomes in low-middle income countries: A  
602 review. *In Seminars in perinatology* 2019 Aug 1 (Vol. 43, No. 5, pp. 247-251). WB  
603 Saunders.
- 604 32. Adataro P, Afaya A, Baku EA, Salia SM, Asempah A. Perspective of traditional birth  
605 attendants on their experiences and roles in maternal health care in rural areas of northern  
606 Ghana. *International journal of reproductive medicine*. 2018 Oct 1;2018.
- 607 33. Adeel M, Yeh AG. Gendered immobility: influence of social roles and local context on  
608 mobility decisions in Pakistan. *Transportation planning and technology*. 2018 Aug  
609 18;41(6):660-78.

- 610 34. Bradfield Z, Kelly M, Hauck Y, Duggan R. Midwives ‘with woman’ in the private  
611 obstetric model: Where divergent philosophies meet. *Women and Birth*. 2019 Apr  
612 1;32(2):157-67.
- 613 35. Downe S, Finlayson K, Fleming A. Creating a collaborative culture in maternity care.  
614 *Journal of midwifery & women's health*. 2010 May 1;55(3):250-4.
- 615 36. Reeves S, Pelone F, Harrison R, Goldman J, Zwarenstein M. Interprofessional  
616 collaboration to improve professional practice and healthcare outcomes. *Cochrane*  
617 *Database of Systematic Reviews*. 2017(6).
- 618 37. Mohammed EN. Knowledge, causes, and experience of inter-professional conflict and  
619 rivalry among healthcare professionals in Nigeria. *BMC Health Services Research*. 2022  
620 Dec;22(1):1-9.
- 621 38. Sarfraz M, Hamid S. Exploring managers’ perspectives on MNCH program in Pakistan: a  
622 qualitative study. *Plos one*. 2016 Jan 12;11(1):e0146665.
- 623 39. Cannon BJ, Ali JH. Devolution in Kenya four years on: A review of implementation and  
624 effects in mandera county. *African Conflict and Peacebuilding Review*. 2018 Apr  
625 1;8(1):1-28.
- 626 40. Maharani A. Decentralisation, performance of health providers and health outcomes in  
627 Indonesia. The University of Manchester (United Kingdom); 2015.
- 628 41. McCollum R, Limato R, Otiso L, Theobald S, Taegtmeier M. Health system governance  
629 following devolution: comparing experiences of decentralisation in Kenya and Indonesia.  
630 *BMJ global health*. 2018 Sep 1;3(5):e000939.

631

632

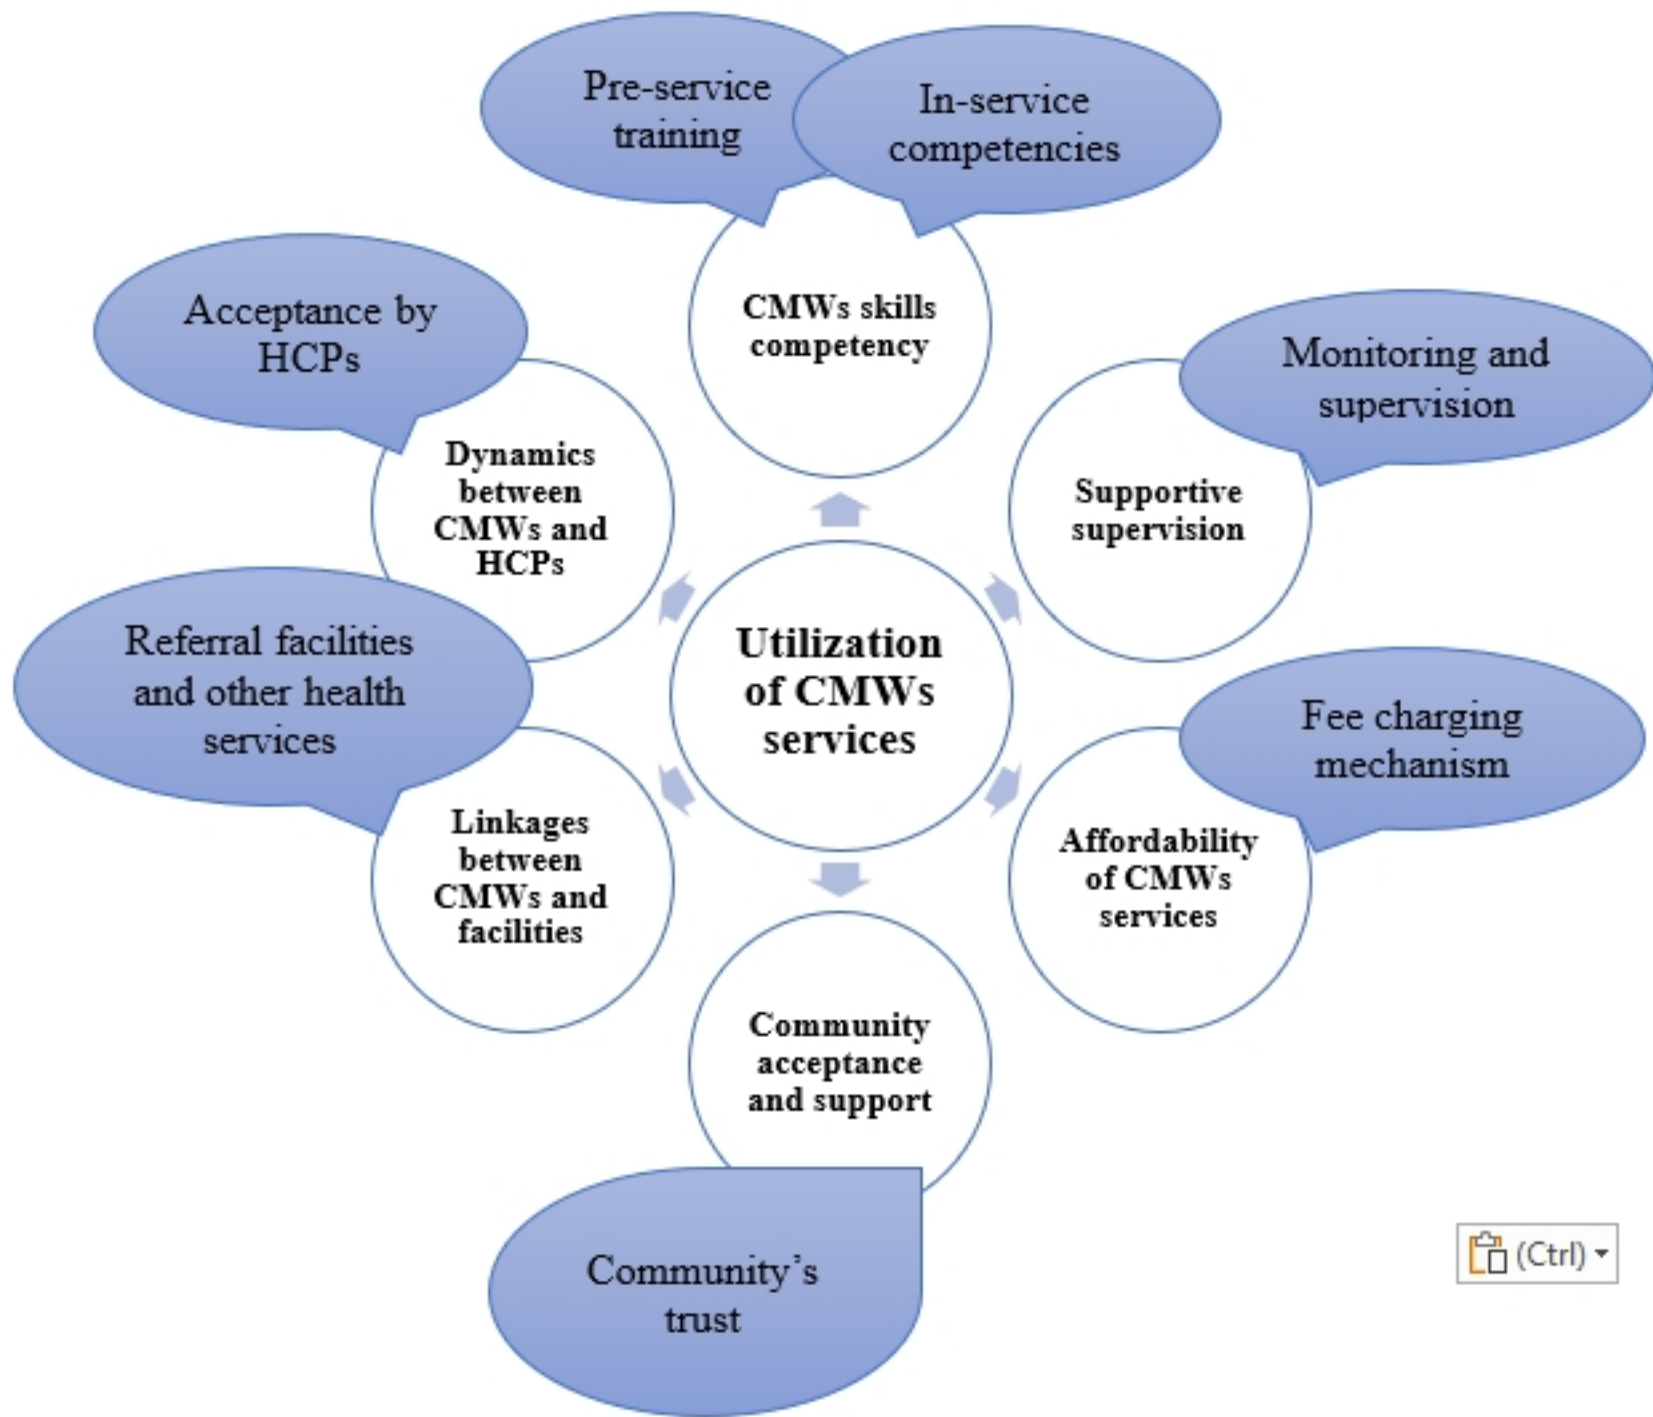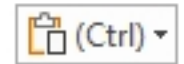

Figure
